# Supplementary material for: Loss of MEN1 activates DNMT1 implicating DNA hypermethylation as a driver of MEN1 tumorigenesis
Source: PubMed Central journal article supplement (PMC4914310; doi:10.18632/oncotarget.7279), 2016-02-09
Supplement: oncotarget-07-12633-s001.pdf [file oncotarget-07-12633-s001.pdf]

## Loss of *MEN1* activates DNMT1 implicating DNA hypermethylation as a driver of *MEN1* tumorigenesis

### Supplementary Materials

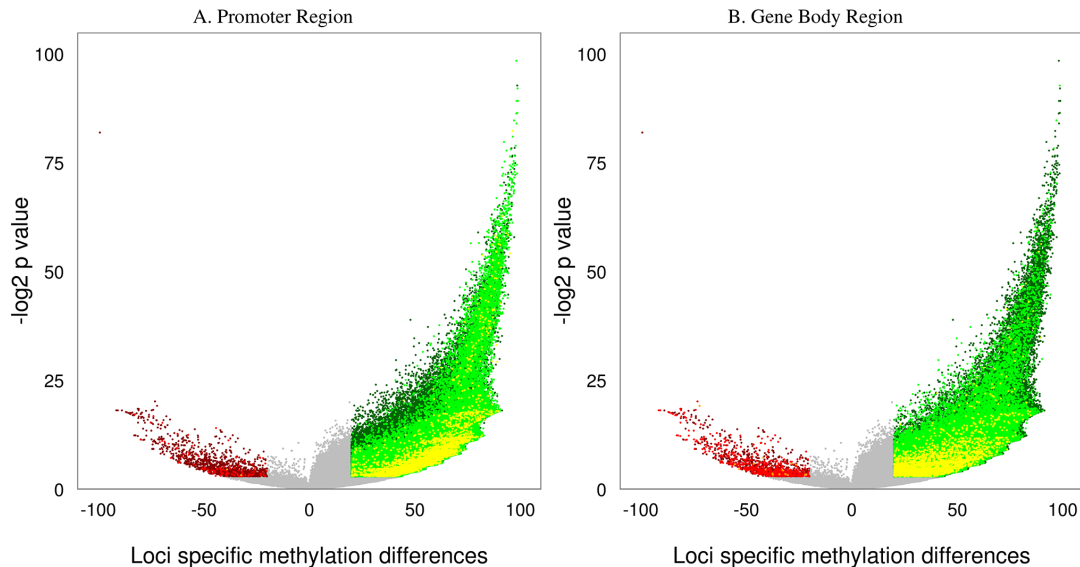

**Supplementary Figure S1: Methylation in the promoter and gene body regions between *MEN1*-parathyroid tumor samples and controls.** On the x-axis are the loci specific methylation differences between the two groups and on the y-axis are the  $-\log_2$  of the corresponding  $P$  values of those mean differences. (A) Volcano plot showing loci specific methylation differences genome-wide (light gray) in the promoter region. On the right, the significant hypermethylated loci (dark green), located in the promoter region (light green) and mapping in the promoter region of tumor suppressor genes (yellow). On the left, the hypomethylated significant loci (dark red), located in the promoter region (light red) and mapping in the promoter region of tumor suppressor genes (orange). (B) Volcano plot showing loci specific methylation differences genome-wide (light gray) in the gene body region (same color assignment as in A).

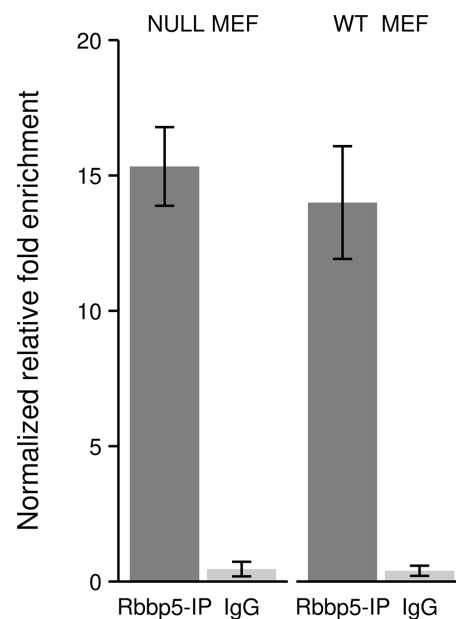

**Supplementary Figure S2: CHIP-PCR analysis of Rbbp5 binding to DNMT1 promoter.** The Rbbp5-IP products were amplified using quantitative real-time RT-PCR with primers corresponding to the promoter regions of the DNMT1 gene. The relative amount of DNA in the ChIP product was calculated using input for the normalization. IgG was used as a control.

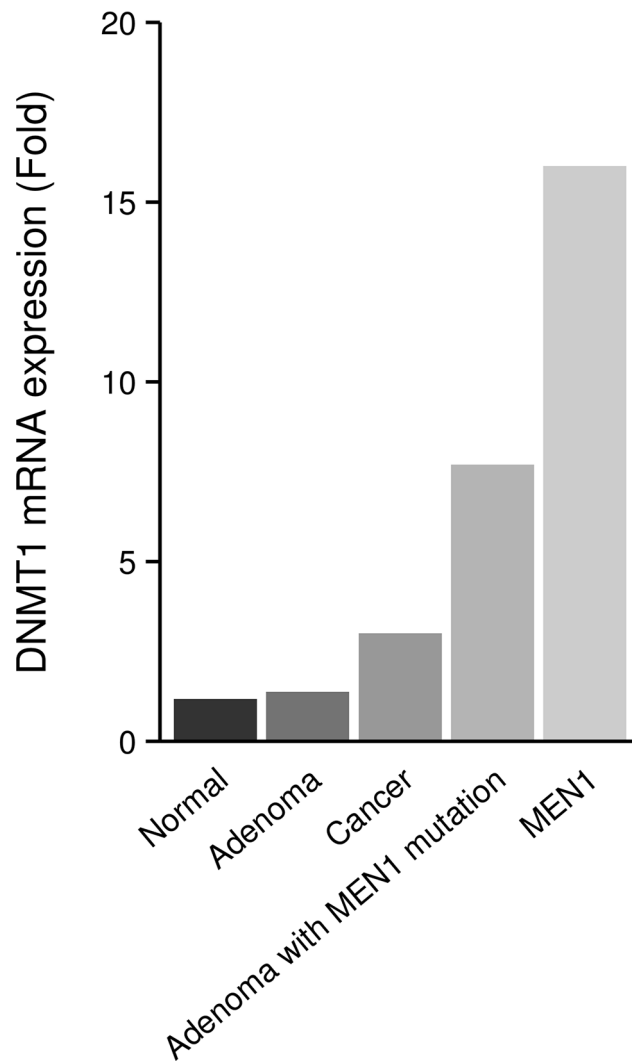

**Supplementary Figure S3: Relative mRNA expression of DNMT1 gene in patients with parathyroid adenoma and parathyroid carcinoma.** mRNA expression of the DNMT1 gene was not significantly increased in tumor tissues from the patients with parathyroid adenoma and parathyroid carcinoma when compared to normal parathyroid tissues. However, the mRNA expression of DNMT1 in the human parathyroid adenoma with a *MEN1* mutation in exon 6 was increased when compared to normal parathyroid tissues.

A

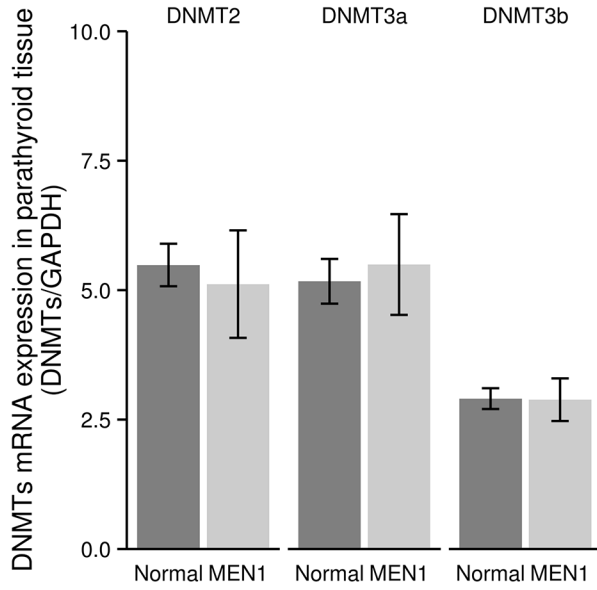

B

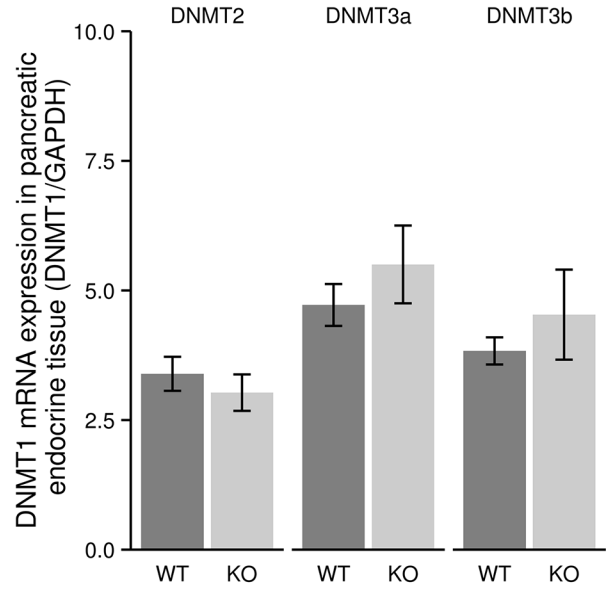

C

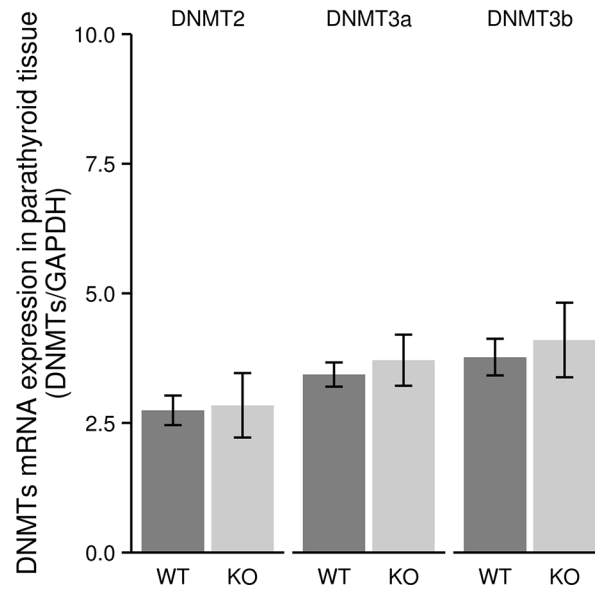

**Supplementary Figure S4: The mRNA expression of DNMT2, DNMT3a, and DNMT3b genes in the endocrine tumor tissues from MEN1 patients and *Men1* KO mice.** mRNA expression of DNMT2, DNMT3a, and DNMT3b was not significantly increased in the endocrine tumor tissues from MEN1 patients (A) and *Men1* KO mice in pancreatic endocrine tissue (B) and parathyroid tissues (C) when compared to normal endocrine tissues from human and WT mice.

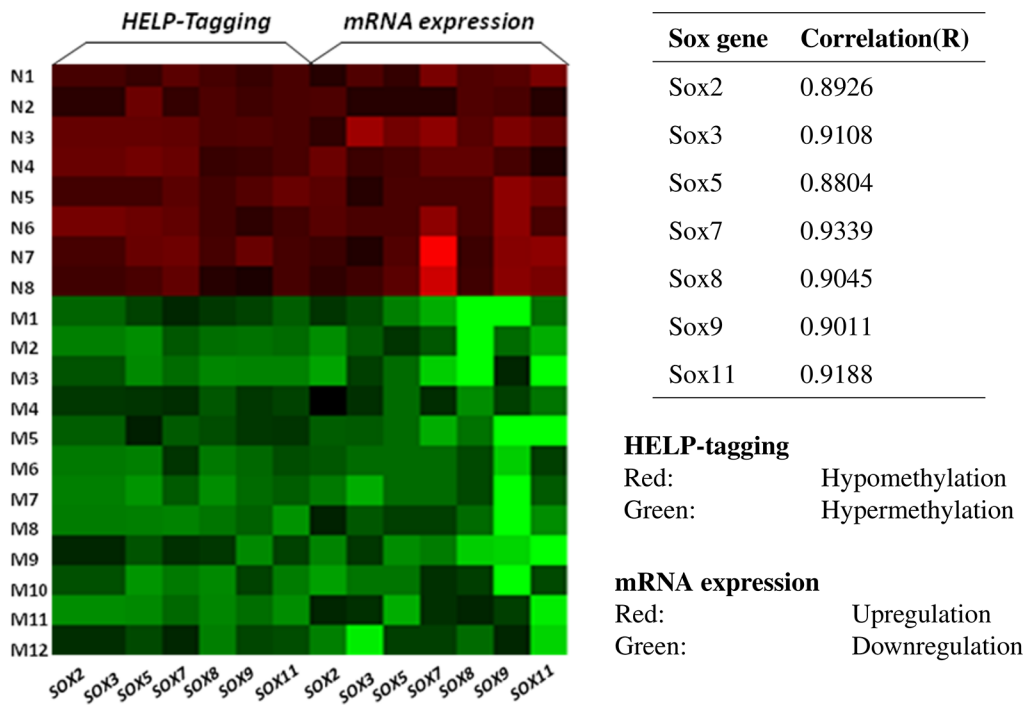

**Supplementary Figure S5: Heatmap of the correlation between HELP-tagging and mRNA expression in Sox gene family.** The HELP-tagging and mRNA expression data on a gene expression heatmap shows a high correlation for the Sox gene family.

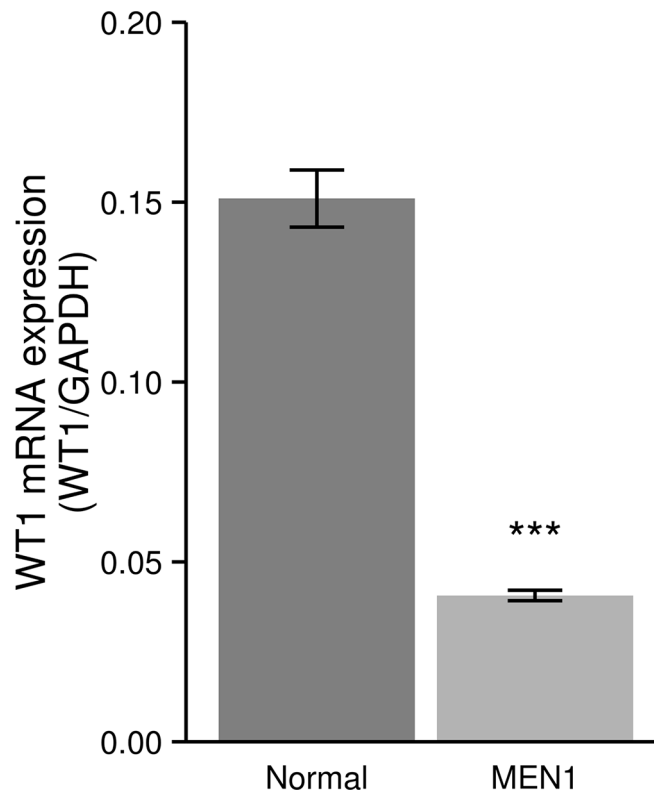

**Supplementary Figure S6: The mRNA expression of WT1 in the MEN1-parathyroid tumors.** The mRNA expression of WT1 is significantly decreased in MEN1-parathyroid tumors when compared to normal human parathyroid tissues. (MEN1: human MEN1 parathyroids; Normal: human normal parathyroids). (\*\*\*)  $P < 0.001$ .

**Supplementary Table S1: List of most methylated genes in the promoter region**

**Supplemental Table S2: Methylation differences in the promoter region of oncogene and tumor suppressor genes**

| Gene name | Chr   | RefSeq ID                                                                             | Methylation difference |
|-----------|-------|---------------------------------------------------------------------------------------|------------------------|
| TNFRSF19  | chr13 | NM_148957                                                                             | 69.03                  |
| SRC       | chr20 | NM_198291                                                                             | 64.58                  |
| TNFSF13B  | chr13 | NM_006573,NM_001145645                                                                | 59.54                  |
| RAB9A     | chrX  | NM_004251                                                                             | 59.46                  |
| TSSC1     | chr2  | NM_003310                                                                             | 57.83                  |
| SOCS4     | chr14 | NM_199421,NM_007086,NM_001008396,NM_080867                                            | 57.01                  |
| BLCAP     | chr20 | NM_006698,NM_001167823,NM_001167821,NM_001167822,<br>NM_001167820                     | 56.16                  |
| BLCAP     | chr20 | NM_006698,NM_001167821,NM_001167822,NM_001167820                                      | 54.79                  |
| KIT       | chr4  | NM_000222,NM_001093772                                                                | 54.53                  |
| CRKL      | chr22 | NM_005207                                                                             | 54.46                  |
| TNFSF11   | chr13 | NM_003701                                                                             | 54.16                  |
| MTUS1     | chr8  | NM_001001925,NM_001001924                                                             | 53.14                  |
| CT62      | chr15 | NM_001102658                                                                          | 53.05                  |
| RAB34     | chr17 | NM_031934,NM_001144942,NR_024575,NM_001142625,NM_001<br>144943,NR_024579,NM_001142624 | 53.05                  |
| RAB43     | chr3  | NM_198490                                                                             | 52.88                  |
| SKIL      | chr3  | NM_005414,NM_001145098                                                                | 52.85                  |
| BRMS1     | chr11 | NM_001024957,NM_015399                                                                | 52.74                  |
| TNFRSF11A | chr18 | NM_003839                                                                             | 52.66                  |
| FLI1      | chr11 | NM_002017                                                                             | 52.52                  |
| BMI1      | chr10 | NM_005180                                                                             | 52.48                  |
| MYBL1     | chr8  | NM_001080416,NM_001144755                                                             | 52.17                  |
| CASC15    | chr6  | NR_015410                                                                             | 51.35                  |
| SUDS3     | chr12 | NM_022491                                                                             | 51.29                  |
| ORAOV1    | chr11 | NM_153451                                                                             | 51.28                  |
| BCAR1     | chr16 | NM_001170714,NM_001170718,NM_001170720                                                | 51.27                  |
| TNFRSF8   | chr1  | NM_001243                                                                             | 51.11                  |
| MAF       | chr16 | NM_005360,NM_001031804                                                                | 51.1                   |
| MERTK     | chr2  | NM_006343                                                                             | 51.04                  |
| BRCA1     | chr17 | NM_007297,NM_007298,NR_027676,NR_003108,NM_007299,NM<br>_007300,NM_007294             | 50.74                  |
| MCC       | chr5  | NM_002387                                                                             | 50.48                  |
| ERBB3     | chr12 | NM_001982,NM_001005915                                                                | 50.4                   |
| FYN       | chr6  | NM_002037                                                                             | 50.31                  |
| TNFAIP3   | chr6  | NM_006290                                                                             | 50.31                  |
| FEV       | chr2  | NM_017521                                                                             | 50.25                  |
| ST7L      | chr1  | NM_138727,NM_138729,NM_138728,NM_017744,NM_006135                                     | 50.18                  |
| TNFSF10   | chr3  | NM_003810                                                                             | 50.01                  |

|           |       |                                                                                                          |       |
|-----------|-------|----------------------------------------------------------------------------------------------------------|-------|
| RAB32     | chr6  | NM_006834                                                                                                | 49.97 |
| WT1       | chr11 | NM_024424,NM_024426,NM_000378,NR_023920,NM_024425                                                        | 49.67 |
| SUFU      | chr10 | NM_016169,NM_005736                                                                                      | 49.53 |
| TP53I13   | chr17 | NM_138349,NM_198147                                                                                      | 49.52 |
| RAP1B     | chr12 | NM_001010942,NM_015646                                                                                   | 49.46 |
| HIC1      | chr17 | NM_001098202,NM_006497                                                                                   | 49.38 |
| ERBB4     | chr2  | NM_005235,NM_001042599                                                                                   | 49.32 |
| ABL1      | chr9  | NM_005157                                                                                                | 49.25 |
| C1QTNF2   | chr5  | NM_031908                                                                                                | 48.95 |
| HIC1      | chr17 | NM_006497                                                                                                | 48.84 |
| ST5       | chr11 | NM_139157,NM_213618                                                                                      | 48.57 |
| VOPP1     | chr7  | NM_030796                                                                                                | 48.52 |
| MCC       | chr5  | NM_001085377                                                                                             | 48.49 |
| SUPT4H1   | chr17 | NM_003168                                                                                                | 48.48 |
| SOCS1     | chr16 | NM_003745                                                                                                | 48.47 |
| HIC1      | chr17 | NM_001098202                                                                                             | 48.44 |
| GLTSCR1   | chr19 | NM_015711                                                                                                | 48.34 |
| MAFF      | chr22 | NM_001161572,NM_001161574,NM_012323,NM_001161573                                                         | 48.32 |
| SOGA1     | chr20 | NM_080627                                                                                                | 48.23 |
| GREB1L    | chr18 | NM_001142966                                                                                             | 48.17 |
| TNFRSF12A | chr16 | NM_016639                                                                                                | 47.84 |
| RAB35     | chr12 | NM_001167606,NM_006861                                                                                   | 47.79 |
| ST14      | chr11 | NM_021978                                                                                                | 47.67 |
| RAB6B     | chr3  | NM_016577                                                                                                | 47.63 |
| SHOC2     | chr10 | NM_007373,NR_024142,NR_024143,NR_024141,NR_024140,<br>NR_015402                                          | 47.33 |
| MYB       | chr6  | NM_001161657,NM_001161656,NM_001161659,NM_001161658,N<br>M_001161660,NM_005375,NM_001130173,NM_001130172 | 47.21 |
| SUPT7L    | chr2  | NM_014860,NM_018158                                                                                      | 47.05 |
| RELT      | chr11 | NM_152222,NM_032871                                                                                      | 47.04 |
| CASC4     | chr15 | NM_138423,NM_177974                                                                                      | 46.97 |
| RAP1A     | chr1  | NM_001010935,NM_002884                                                                                   | 46.95 |
| RAB33B    | chr4  | NM_031296                                                                                                | 46.77 |
| BCAR1     | chr16 | NM_014567,NM_001170717                                                                                   | 46.76 |
| SOCS2     | chr12 | NM_003877                                                                                                | 46.66 |
| SUV39H1   | chrX  | NM_003173                                                                                                | 46.6  |
| LYN       | chr8  | NM_001111097,NM_002350                                                                                   | 46.57 |
| FGFR1OP2  | chr12 | NM_001171887,NM_015633,NM_001171888,NM_018164                                                            | 46.49 |
| RABL3     | chr3  | NM_173825,NM_005513                                                                                      | 46.49 |
| CBL       | chr11 | NM_005188                                                                                                | 46.44 |
| BCAR1     | chr16 | NM_001170714,NM_001170718,NM_001170720,NM_001170716                                                      | 46.37 |
| SUV420H1  | chr11 | NM_016028,NM_017635                                                                                      | 46.37 |
| RAB28     | chr4  | NM_004249,NM_001159601,NM_001017979                                                                      | 46.19 |
| RALA      | chr7  | NM_005402                                                                                                | 46.19 |
| REL       | chr2  | NM_002908                                                                                                | 46.18 |

|           |       |                                                  |       |
|-----------|-------|--------------------------------------------------|-------|
| MAFA      | chr8  | NM_201589                                        | 46.17 |
| LATS2     | chr13 | NM_014572                                        | 46.14 |
| PVT1      | chr8  | NR_003367,NR_031609                              | 46.05 |
| TNFRSF21  | chr6  | NM_014452                                        | 45.99 |
| SOCS6     | chr18 | NM_004232                                        | 45.98 |
| TSG101    | chr11 | NM_006292                                        | 45.87 |
| RAB27B    | chr18 | NM_004163                                        | 45.82 |
| CNKS2R2   | chrX  | NM_014927,NM_001168647,NM_001168649,NM_001168648 | 45.72 |
| RAB8B     | chr15 | NM_016530                                        | 45.68 |
| RAP2B     | chr3  | NM_002886                                        | 45.64 |
| MYCL      | chr1  | NM_001033081,NM_005376,NM_001033082              | 45.59 |
| TPRG1L    | chr1  | NM_182752                                        | 45.47 |
| RAP2C     | chrX  | NM_021183                                        | 45.39 |
| PIM2      | chrX  | NM_006875                                        | 45.37 |
| SUV420H2  | chr19 | NM_032701                                        | 45.26 |
| TNFRSF11B | chr8  | NM_002546                                        | 45.21 |
| SOCS7     | chr17 | NM_014598                                        | 45.11 |
| FLI1      | chr11 | NM_002017,NM_001167681                           | 45.1  |
| RALB      | chr2  | NM_002881                                        | 44.98 |
| MYC       | chr8  | NM_002467                                        | 44.92 |
| KRAS      | chr12 | NM_033360,NM_004985                              | 44.89 |
| CBLB      | chr3  | NM_170662                                        | 44.88 |
| LZTS2     | chr10 | NM_032429                                        | 44.83 |
| RRAS      | chr19 | NM_006270,NM_021228                              | 44.8  |
| MAFB      | chr20 | NM_005461                                        | 44.76 |
| TNFSF15   | chr9  | NM_005118                                        | 44.7  |
| TNFAIP1   | chr17 | NM_021137,NM_174887                              | 44.59 |
| BCAR3     | chr1  | NM_003567                                        | 44.58 |
| BRAF      | chr7  | NM_004333                                        | 44.27 |
| CRK       | chr17 | NM_016823,NM_005206                              | 44.08 |
| RAB15     | chr14 | NM_198686                                        | 44.08 |
| FGFR1OP   | chr6  | NM_007045,NM_194429                              | 44.02 |
| ERBB2     | chr17 | NM_004448                                        | 43.98 |
| RAB5B     | chr12 | NM_002868                                        | 43.98 |
| SFSWAP    | chr12 | NM_004592                                        | 43.87 |
| RELA      | chr11 | NM_021975,NM_001145138                           | 43.86 |
| SET       | chr9  | NM_003011                                        | 43.76 |
| CASC2     | chr10 | NR_026941,NM_014904,NR_026940,NR_026939          | 43.7  |
| RAB11B    | chr19 | NM_004218                                        | 43.63 |
| FOS       | chr14 | NM_005252                                        | 43.61 |
| YES1      | chr18 | NM_005433                                        | 43.61 |
| SEL1L     | chr14 | NM_005065                                        | 43.52 |
| SOCS3     | chr17 | NM_003955                                        | 43.44 |
| RAB12     | chr18 | NM_001025300                                     | 43.4  |
| MRAS      | chr3  | NM_001085049,NM_012219                           | 43.35 |

|          |       |                                                                   |       |
|----------|-------|-------------------------------------------------------------------|-------|
| NKTR     | chr3  | NM_005385                                                         | 43.3  |
| HRASLS5  | chr11 | NM_054108,NM_001146728,NM_001146729                               | 43.27 |
| PTTG1IP  | chr21 | NM_004339                                                         | 43.27 |
| TNFRSF19 | chr13 | NM_018647                                                         | 43.25 |
| RAB1A    | chr2  | NM_004161,NM_015543                                               | 43.22 |
| CDON     | chr11 | NM_016952                                                         | 43.14 |
| RAB7A    | chr3  | NM_004637                                                         | 43.13 |
| ETS1     | chr11 | NM_005238,NM_001162422                                            | 43.12 |
| SRC      | chr20 | NM_005417,NM_198291                                               | 43.1  |
| PTOV1    | chr19 | NM_017432                                                         | 43.04 |
| NTPCR    | chr1  | NM_032324                                                         | 43.02 |
| LATS1    | chr6  | NM_004690                                                         | 43    |
| CYLD     | chr16 | NM_001042412,NM_001042355,NM_015247                               | 42.94 |
| RAB11A   | chr15 | NM_004663                                                         | 42.94 |
| RAB40B   | chr17 | NM_006822                                                         | 42.85 |
| PIM3     | chr22 | NM_001001852                                                      | 42.83 |
| PRAC1    | chr17 | NM_032391                                                         | 42.83 |
| JUNB     | chr19 | NM_002229                                                         | 42.77 |
| ARAF     | chrX  | NM_001654                                                         | 42.76 |
| PIM1     | chr6  | NM_002648                                                         | 42.66 |
| ABL1     | chr9  | NM_007313                                                         | 42.61 |
| MOS      | chr8  | NM_005372                                                         | 42.6  |
| BOC      | chr3  | NM_033254                                                         | 42.56 |
| AKT2     | chr19 | NM_001626                                                         | 42.55 |
| SEL1L3   | chr4  | NM_015187                                                         | 42.53 |
| RAB23    | chr6  | NM_016277,NM_183227                                               | 42.47 |
| WTIP     | chr19 | NM_001080436                                                      | 42.46 |
| COLCA2   | chr11 | NM_001136105,NM_207429                                            | 42.43 |
| SCAI     | chr9  | NM_001144877,NM_173690                                            | 42.37 |
| TP73     | chr1  | NM_005427,NM_017818                                               | 42.36 |
| MTSS1    | chr8  | NM_014751                                                         | 42.28 |
| ETS2     | chr21 | NM_005239                                                         | 42.27 |
| RAP2A    | chr13 | NM_021033                                                         | 42.27 |
| SUPT16H  | chr14 | NM_007192                                                         | 42.26 |
| RAB13    | chr1  | NM_002870                                                         | 42.18 |
| RABL6    | chr9  | NM_001173989,NM_001173988,NM_024718,NM_017995,<br>NR_024580       | 42.18 |
| ERG      | chr21 | NM_004449,NM_001136154                                            | 42.15 |
| AKT1     | chr14 | NM_001014431,NM_005163,NM_001014432                               | 41.82 |
| DLEC1    | chr3  | NM_007335,NM_007337                                               | 41.81 |
| RAB2A    | chr8  | NM_002865                                                         | 41.72 |
| FLI1     | chr11 | NM_001167681                                                      | 41.71 |
| RAB3C    | chr5  | NM_138453                                                         | 41.7  |
| RAB40C   | chr16 | NM_001172666,NM_001172665,NM_001172663,NM_001172664,<br>NM_021168 | 41.65 |



|           |       |                                                  |       |
|-----------|-------|--------------------------------------------------|-------|
| RET       | chr10 | NM_020975,NM_020630                              | 41.52 |
| WTAP      | chr6  | NM_152858,NM_004906,NM_152857                    | 41.5  |
| CASC3     | chr17 | NM_007359                                        | 41.47 |
| SUPT3H    | chr6  | NM_003599,NM_181356                              | 41.47 |
| SUGT1     | chr13 | NM_001130912,NM_006704                           | 41.37 |
| SKI       | chr1  | NM_003036                                        | 41.36 |
| RAB31     | chr18 | NM_006868                                        | 41.29 |
| TP53INP1  | chr8  | NM_033285,NM_001135733                           | 41.28 |
| RAB6A     | chr11 | NM_198896,NM_002869                              | 41.24 |
| TP53BP2   | chr1  | NM_005426,NM_001031685                           | 41.23 |
| SET       | chr9  | NM_001122821                                     | 41.06 |
| TP53BP1   | chr15 | NM_005657                                        | 40.99 |
| FOSB      | chr19 | NM_001114171,NM_006732                           | 40.92 |
| RAB1B     | chr11 | NM_030981                                        | 40.89 |
| RRAS2     | chr11 | NM_001102669,NM_001177315,NM_012250              | 40.78 |
| TUSC3     | chr8  | NM_006765,NM_178234                              | 40.74 |
| RAF1      | chr3  | NM_002880                                        | 40.65 |
| OVCA2     | chr17 | NM_080822                                        | 40.55 |
| DEK       | chr6  | NM_001134709,NM_003472                           | 40.43 |
| TP73      | chr1  | NM_005427                                        | 40.39 |
| RAB42     | chr1  | NM_152304                                        | 40.32 |
| SUV39H2   | chr10 | NM_024670                                        | 40.29 |
| JUND      | chr19 | NM_005354                                        | 40.26 |
| SACM1L    | chr3  | NM_014016                                        | 40.25 |
| TNFSF9    | chr19 | NM_003811                                        | 40.24 |
| RAB4A     | chr1  | NM_004578                                        | 40.1  |
| RAB7L1    | chr1  | NM_003929,NM_001135664,NM_001135663,NM_001135662 | 40.03 |
| RAB3B     | chr1  | NM_002867                                        | 39.8  |
| RSU1      | chr10 | NM_012425,NM_152724                              | 39.71 |
| TPD52     | chr8  | NM_001025253,NM_005079                           | 39.71 |
| JUN       | chr1  | NM_002228                                        | 39.47 |
| TNFRSF1A  | chr12 | NM_001065                                        | 39.42 |
| TPD52L1   | chr6  | NM_001003397,NM_001003396,NM_003287,NM_001003395 | 39.34 |
| TNFRSF14  | chr1  | NM_003820                                        | 39.32 |
| LDOC1     | chrX  | NM_012317                                        | 39.1  |
| RAB5A     | chr3  | NM_004162                                        | 39.05 |
| TACSTD2   | chr1  | NM_002353                                        | 39.05 |
| RAB27A    | chr15 | NM_183235                                        | 39.02 |
| GPS1      | chr17 | NM_212492,NM_002917,NM_004127                    | 38.67 |
| SUPV3L1   | chr10 | NM_003171                                        | 38.66 |
| GPS2      | chr17 | NM_004489                                        | 38.58 |
| TNFRSF10C | chr8  | NM_003841                                        | 38.43 |
| TP53INP2  | chr20 | NM_021202                                        | 38.39 |
| HRAS      | chr11 | NM_005343,NM_001130442,NM_198075,NM_176795       | 38.33 |
| BLCAP     | chr20 | NM_001167823                                     | 38.26 |

|           |       |                                                                                                   |       |
|-----------|-------|---------------------------------------------------------------------------------------------------|-------|
| TNFRSF1B  | chr1  | NM_001066                                                                                         | 38.24 |
| RAB20     | chr13 | NM_017817                                                                                         | 38.19 |
| SMEK1     | chr14 | NM_032560                                                                                         | 37.93 |
| TUSC1     | chr9  | NM_001004125                                                                                      | 37.92 |
| RAB14     | chr9  | NM_016322                                                                                         | 37.9  |
| DLC1      | chr8  | NM_006094                                                                                         | 37.84 |
| KSR2      | chr12 | NM_173598                                                                                         | 37.82 |
| SUPT20H   | chr13 | NM_017569,NM_001014286                                                                            | 37.78 |
| TNFRSF10D | chr8  | NM_003840                                                                                         | 37.78 |
| RABL2B    | chr22 | NM_001130921,NM_001130920,NM_001130919,NM_001130922,NM_001003789,NM_007081,NM_001130923,NR_026982 | 37.76 |
| ABL2      | chr1  | NM_001168237,NM_001168236,NM_001168238,NM_007314,NM_001136001                                     | 37.68 |
| FES       | chr15 | NM_001143783,NM_001143785,NM_001143784,NM_002005                                                  | 37.68 |
| MYBL2     | chr20 | NM_002466                                                                                         | 37.63 |
| CBLC      | chr19 | NM_001130852,NM_012116                                                                            | 37.4  |
| TP53I3    | chr2  | NM_004881,NM_147184                                                                               | 37.22 |
| MDM2      | chr12 | NM_002392                                                                                         | 36.94 |
| RRAS      | chr19 | NM_006270                                                                                         | 36.87 |
| HRAS      | chr11 | NM_005343,NM_001130442,NM_176795                                                                  | 36.81 |
| PTTG1     | chr5  | NM_004219                                                                                         | 36.63 |
| RAB4B     | chr19 | NM_016154                                                                                         | 36.57 |
| RAB26     | chr16 | NM_014353                                                                                         | 36.44 |
| MAFK      | chr7  | NM_002360                                                                                         | 36.41 |
| RAB39B    | chrX  | NM_171998                                                                                         | 36.36 |
| TNFRSF6B  | chr20 | NM_003823                                                                                         | 36.33 |
| MTUS2     | chr13 | NM_015233                                                                                         | 35.96 |
| RAB18     | chr10 | NM_021252                                                                                         | 35.81 |
| TNFRSF10A | chr8  | NM_003844                                                                                         | 35.79 |
| TP53BP1   | chr15 | NM_001141980,NM_001141979                                                                         | 35.42 |
| SNCG      | chr10 | NM_003087                                                                                         | 35.14 |
| ELK1      | chrX  | NM_005229,NM_001114123                                                                            | 35.11 |
| BRMS1     | chr11 | NM_001024957,NM_006876,NM_015399                                                                  | 35.01 |
| AKT1      | chr14 | NM_001014431,NM_001014432                                                                         | 34.98 |
| SKIL      | chr3  | NM_005414,NM_001145098,NM_001145097                                                               | 34.98 |
| SIKE1     | chr1  | NM_025073,NM_001102396                                                                            | 34.83 |
| RAN       | chr12 | NM_006325                                                                                         | 34.7  |
| RAB40C    | chr16 | NM_001172666,NM_001172665,NM_001172663,NM_001172664                                               | 34.58 |
| RAB5C     | chr17 | NM_004583,NM_201434                                                                               | 34.27 |
| CASC5     | chr15 | NM_144508,NM_170589                                                                               | 34.25 |
| RAB37     | chr17 | NM_001006638,NM_001163990,NM_001163989                                                            | 34.18 |
| SDCCAG3   | chr9  | NM_006643,NM_001039708,NM_001039707,NM_015160                                                     | 34.18 |
| RTDR1     | chr22 | NM_014433                                                                                         | 34.1  |
| RAB3A     | chr19 | NM_002866                                                                                         | 33.83 |
| TNFAIP2   | chr14 | NM_006291                                                                                         | 33.77 |

|           |       |                                                                                                           |       |
|-----------|-------|-----------------------------------------------------------------------------------------------------------|-------|
| TNFAIP8L1 | chr19 | NM_001167942,NM_152362                                                                                    | 33.75 |
| RAB39A    | chr11 | NM_017516                                                                                                 | 33.74 |
| HIC2      | chr22 | NM_015094                                                                                                 | 33.56 |
| RAB19     | chr7  | NM_001008749                                                                                              | 33.44 |
| SMEK2     | chr2  | NM_001122964,NM_020463                                                                                    | 33.42 |
| SUPT5H    | chr19 | NM_001111020,NM_001130824,NM_001130825,NM_003169                                                          | 33.42 |
| TNFRSF18  | chr1  | NM_004195,NM_148901,NM_148902                                                                             | 33.34 |
| TPD52L2   | chr20 | NM_199361,NM_199359,NM_199360,NM_199363,NM_199362,<br>NM_003288                                           | 33.14 |
| C1QTNF1   | chr17 | NM_030968,NM_198594                                                                                       | 33.12 |
| SOCS5     | chr2  | NM_014011,NM_144949                                                                                       | 33.08 |
| CASC1     | chr12 | NM_018272,NM_001082972,NM_001082973,NM_001001660                                                          | 33.03 |
| MACC1     | chr7  | NM_182762                                                                                                 | 32.82 |
| MTSS1L    | chr16 | NM_138383                                                                                                 | 32.77 |
| GLTSCR2   | chr19 | NM_015710                                                                                                 | 32.67 |
| TNFRSF13C | chr22 | NM_052945                                                                                                 | 32.61 |
| PVT1      | chr8  | NR_031609                                                                                                 | 32.6  |
| RAB37     | chr17 | NM_175738                                                                                                 | 32.4  |
| MET       | chr7  | NM_001127500,NM_000245                                                                                    | 32.13 |
| C1QTNF4   | chr11 | NM_031909                                                                                                 | 31.96 |
| RAB6C     | chr2  | NM_032144                                                                                                 | 31.79 |
| RAB6A     | chr2  | NM_001077637                                                                                              | 31.78 |
| RELB      | chr19 | NM_006509                                                                                                 | 31.72 |
| BRCA2     | chr13 | NM_000059                                                                                                 | 31.41 |
| TNFAIP8   | chr5  | NM_014350                                                                                                 | 31.17 |
| RAB34     | chr17 | NM_031934,NM_001144942,NR_000013,NR_024575,NM_0011426<br>25,NM_001144943,NR_024579,NM_001142624,NM_000984 | 30.99 |
| RAB3D     | chr19 | NM_004283                                                                                                 | 30.95 |
| RAB10     | chr2  | NM_016131                                                                                                 | 30.63 |
| SOGA1     | chr20 | NM_199181,NM_080627                                                                                       | 30.58 |
| UCA1      | chr19 | NR_015379                                                                                                 | 30.58 |
| VHL       | chr3  | NM_000551,NM_198156                                                                                       | 30.51 |
| RAB33A    | chrX  | NM_004794                                                                                                 | 30.46 |
| RAB38     | chr11 | NM_022337                                                                                                 | 30.42 |
| SUFU      | chr10 | NM_016169                                                                                                 | 30.17 |
| TNFAIP8   | chr5  | NM_001077654                                                                                              | 29.98 |
| FGR       | chr1  | NM_005248                                                                                                 | 29.91 |
| SAPCD2    | chr9  | NM_178448                                                                                                 | 29.91 |
| RAB34     | chr17 | NM_031934,NM_001144942,NR_024575,NM_001142625,NM_001<br>144943,NR_024579,NM_001142624,NM_000984           | 29.44 |
| BCAR1     | chr16 | NM_001170714,NM_001170718,NM_001170720,NM_001170715,<br>NM_001170716                                      | 29.38 |
| RAB8A     | chr19 | NM_005370                                                                                                 | 29.06 |
| BCAR1     | chr16 | NM_014567,NM_001170717,NM_001170719                                                                       | 29.04 |
| RAB9B     | chrX  | NM_016370                                                                                                 | 28.8  |

|           |       |                                        |       |
|-----------|-------|----------------------------------------|-------|
| MAFG      | chr17 | NM_032711                              | 28.33 |
| TUSC5     | chr17 | NM_172367                              | 28.07 |
| BRMS1L    | chr14 | NM_032352                              | 28.04 |
| NRAS      | chr1  | NM_002524                              | 28.04 |
| C1QTNF6   | chr22 | NM_031910,NM_182486                    | 27.97 |
| TNFAIP8L3 | chr15 | NM_207381                              | 27.78 |
| TNFRSF10B | chr8  | NM_003842,NR_027140,NM_147187          | 27.74 |
| TSSC4     | chr11 | NM_005706                              | 27.48 |
| C1QTNF8   | chr16 | NM_207419                              | 27.37 |
|           | chr20 | NM_014731                              | 27.14 |
| DMBT1     | chr10 | NM_007329,NM_004406,NM_017579          | 26.9  |
| BCAR1     | chr16 | NM_001170719                           | 26.81 |
| C1QTNF3   | chr5  | NM_181435,NM_030945                    | 26.67 |
| RAB36     | chr22 | NM_004914                              | 26.62 |
| CASC8     | chr8  | NR_024393                              | 26.45 |
| MRAS      | chr3  | NM_001085049                           | 25.42 |
| LDOC1L    | chr22 | NM_032287                              | 25.04 |
| SMEK3P    | chrX  | NR_002784                              | 23.88 |
| RAB17     | chr2  | NM_022449,NR_033308                    | 22.7  |
| RAB21     | chr12 | NM_014999                              | 22.19 |
| TP73      | chr1  | NM_001126240,NM_001126241,NM_001126242 | 21.94 |
| USP4      | chr3  | NM_003363,NM_199443                    | 21.71 |
| RAB25     | chr1  | NM_020387                              | 21.26 |
| SPI1      | chr11 | NM_003120,NM_001080547                 | 20.94 |
| CT47A7    | chrX  | NM_001080140                           | 20.57 |

**Supplemental Table S3: Methylation differences in the promoter region of Polycomb group genes**

| Gene name | Chr   | RefSeq ID              | Methylation difference |
|-----------|-------|------------------------|------------------------|
| BMI1      | chr10 | NM_005180              | 52.48                  |
| PCGF2     | chr17 | NM_007144              | 49.57                  |
| EZH2      | chr7  | NM_152998,NM_004456    | 48.48                  |
| RNF2      | chr1  | NM_007212              | 45.64                  |
| YY1       | chr14 | NM_003403              | 44.76                  |
| EPC1      | chr10 | NM_025209              | 44.32                  |
| SUZ12     | chr17 | NM_015355              | 41.08                  |
| PCGF5     | chr10 | NM_032373              | 40.43                  |
| RBM11     | chr21 | NM_144770              | 39.07                  |
| EPC2      | chr2  | NM_015630              | 38.8                   |
| RING1     | chr6  | NM_002931,NR_029633    | 38.8                   |
| PCGF6     | chr10 | NM_032154,NM_001011663 | 33.6                   |
| PCGF1     | chr2  | NM_032673              | 30.06                  |
| PCGF3     | chr4  | NM_006315              | 26.42                  |
| RING1     | chr6  | NM_002931              | 9.1                    |

**Supplementary Table S4: Validation data from HELP-tagging by mass array and pyrosequence assays**

|                              | Correlation Coefficient |                           |
|------------------------------|-------------------------|---------------------------|
|                              | HELP-tagging/MassArray  | HELP-tagging/Pyrosequence |
| Normal parathyroid tissues   | -0.9284                 | -0.8505                   |
| parathyroid adenomas         | -0.8678                 | -0.9298                   |
| parathyroid carcinomas       | -0.9017                 | -0.9471                   |
| MEN1-parathyroid Hyperplasia | -0.8882                 | -0.9251                   |
| Total                        | -0.8943                 | -0.9233                   |

**Supplemental Table S5: Somatic mutations of MEN1 gene in sporadic parathyroid adenomas**

| Samples     | Mutation                  | Location                 |
|-------------|---------------------------|--------------------------|
| Ad2         | Silent mutation           | Leu170Leu, Exon 2        |
| Ad4         | Silent mutation           | Gly200Gly, Exon 2        |
| Ad7         | Silent mutation           | Leu 223Leu, Exon 3       |
| Ad7         | Silent mutation           | His328His, Exon 6        |
| Ad10        | Silent mutation           | Asn373Asn, Exon 7        |
| Ad17        | Silent mutation           | Gly390Gly, Exon 7        |
| Ad18        | Silent mutation           | Gly470Gly, Exon 7        |
| Ad19        | Silent mutation           | Ser510Ser, Exon 7        |
| <b>Ad20</b> | <b>Missense mutation*</b> | <b>Leu338Pro, Exon 6</b> |

**Supplemental Table S6: Primer sequences for Bisulfate-MassArray and Pyrosequencing assays**

| MassArray |                                                                                         |
|-----------|-----------------------------------------------------------------------------------------|
| DL1.1     | Sense: 5'-GGGAGTTTATTTAAGGTTTGTGTTAT-3'<br>Antisense: 5'-TTCCCTAAAAATACTACTCCAACCTC-3   |
| DL1.2     | Sense: 5'-TTATAGTGGTAAATATGGGGAGAGA-3'<br>Antisense: 5'-CCAACCTAAAAACCAAAACATAATA-3'    |
| DL1.3     | Sense: 5'-TTTAAGGGTTGAGTTTTGTTAATAAG-3'<br>Antisense: 5'-AAAAATAACTTTTTACCCTCTCCTAC-3'  |
| DL2.3     | Sense: 5'-GTTTTTTTTTAGTTGGGATAGGTTTTA-3<br>Antisense: 5'-TCCAACCTATCTTTCTACTCCCTAACT-3  |
| DL3.1     | Sense: 5'-GATTGTGGTGTTCATTTGTTTAGTTTA-3'<br>Antisense: 5'-ATAAATCCAAAAATTTTCTCATACCA-3' |
| DL3.2     | Sense: 5'-TTTAATTTTTAATGATTGGAGATGTT-3'<br>Antisense: 5'-ACTAAACTTTTCATACCCACCTTCTA-3'  |
| DL3.5     | Sense: 5'-GTATTGAATAAATATTGGGAGGGTTA-3'<br>Antisense: 5'-CACCACCTATAAAAAACTATCCTACA-3'  |
| DL4.2     | Sense: 5'-GGGGTGAGTAAGAAGTAGTAGGAGTA-3'<br>Antisense: 5'-TTCCCCTTTTAAAAATAAAACATAAA-3'  |
| DL5.4     | Sense: 5'-GATTGAATGGGGATGTTAATTAATAT-3'<br>Antisense: 5'-CTAACCTAACCAAAAAAAACTTAAA-3    |

| <b>Pyrosequencing</b> |                                                                                                                                |
|-----------------------|--------------------------------------------------------------------------------------------------------------------------------|
| Pyroseq-1             | Sense: 5'-AGGAATGGGGTAGGGAGGAT-3'<br>Antisense: 5'-(BIOTIN)- TACCCAATATCTCTCCCACACCTA-3'<br>Seq: 5'-GAGAGGTTGAGGGAAGT-3'       |
| Pyroseq-2             | Sense: 5'-TTTTTTAGTTGGGATAGGTTTTAG-3'<br>Antisense: 5'-(BIOTIN)- CCCACCACCCAATAATAAATAAC-3'<br>Seq: 5'-AGGAGTGTGTGAATTAGAGT-3' |
| Pyroseq-3             | Sense: 5'-(BIOTIN)- TTGAATAAATATTGGGAGGGTTAG-3'<br>Antisense: 5'-CCCACCACCCAATAATAAATAAC-3'<br>Seq: 5'-AGGAGTGTGTGAATTAGAGT-3' |
| Pyroseq-4             | Sense: 5'(BIOTIN)- GGGGTGAGTAAGAAGTAGTAGGA-3'<br>Antisense: 5'-ACTAAACCCCAATATCAACAAAC-3'<br>Seq: 5'-AAAAAAAAAAAAACTAACC-3'    |

**Supplemental Table S7: Primer sequences for Real-Time RT-PCR assay**

|            |                                                                                    |
|------------|------------------------------------------------------------------------------------|
| mDNMT1     | Sense: 5'-TGACAGTGGTGCTGAAGAAGCCAT-3'<br>Antisense: 5'-AGAATGGAGCCTCGAATTCTGAGA-3' |
| mDNMT2     | Sense: 5'-GCTGCGAGAAAGTCATATCC-3<br>Antisense: 5'-TGGCATGGAGGGCTCATT-3             |
| mDNMT3a    | Sense: 5'-GGACAAGAATGCCACCAAAG-3'<br>Antisense: 5'-CCACTGAGAATTTGCCGTCT-3'         |
| mDNMT3b    | Sense: 5'-AGATCAAGCTCGCGACTCTC-3'<br>Antisense: 5-GACAGCTGGGCTTTCTGAA-3'           |
| mMen1      | Sense: 5'-GAAGATCATGCTTGGGTGGT-3'<br>Antisense: 5'-CAGGTCTGCCAAGTTCCTA-3'          |
| mRbbp5     | Sense: 5'-CTTGACCAGAGGCATTGCTA-3'<br>Antisense: 5'-CTCTGGTCGCAATCTCCTGA-3'         |
| mSox2      | Sense: 5'-ACCAGCTCGCAGACCTACAT-3'<br>Antisense: 5'-GTGGGAGGAAGAGGTAACCA-3'         |
| mSox3      | Sense: 5'-GAACGCATCAGGTGAGAGAAG-3'<br>Antisense: 5'-GTCGGAGTGGTGCTCAGG-3'          |
| mSox5      | Sense: 5'-AGGATGTCTTCCAAGCGACC-3'<br>Antisense: 5'-CCTCAGAGTGAGGCTTGTTG-3          |
| mSox7      | Sense: 5'-CCCCATGAATGCCTTCATGG-3'<br>Antisense: 5'-AGGGTCTCTTCTGGGACAGT-3'         |
| mSox8      | Sense: 5'-CATCTCCATAACGCAGAGCT-3'<br>Antisense: 5'-TCGCCTGGCTGGTATTTGT-3'          |
| mSox9      | Sense: 5'-AGCAAGACTCTGGGCAAGCT-3'<br>Antisense: 5'-TCCGTTCTTCCCGACTTCC-3'          |
| mSox11     | Sense: 5'-ACCCGGACTGGTGCAAGAC-3'<br>Antisense: 5'-CGACTGCTCCATGATCTTCCT-3'         |
| mβ-catenin | Sense: 5'-AAGGAAGCTTCCAGACATGC-3'<br>Antisense: 5'-AGCTTGCTCTTGTATTGCC-3'          |
| mGAPDH     | Sense: 5'-ATCACTGCCACCCAGAAGACT-3'<br>Antisense: 5'-CATGCCAGTGAGCTTCCCATT-3'       |
| hDNMT1     | Sense: 5'-GAGGAAGCTGCTAAGGACTAGTTC-3'<br>Antisense: 5'-ACTGCACAATTTGATCACTAAATC-3' |
| hMEN1      | Sense: 5'-GTACCTGGCTGGCTACCACTGTC-3'<br>Antisense: 5'-CCGGGCTTCTCGCCCCACGG-3'      |

|            |                                                                              |
|------------|------------------------------------------------------------------------------|
| hRbbp5     | Sense: 5'-TGGAGTTTGGAGGAGGACCTC-3'<br>Antisense: 5'-CCAGATACAGCATCTCTCCC-3'  |
| hSox2      | Sense: 5'-GGGCAGCGTGTACTTATCCT-3'<br>Antisense: 5'-AGAACCCCAAGATGCACAAC-3'   |
| hSox3      | Sense: 5'-CCCATGAACGCCTTCATGGT-3'<br>Antisense: 5'-CTCGTCGATGAATGGTCGCT-3'   |
| hSox5      | Sense: 5'-CTCTCCACCTTCTCCATCTC-3'<br>Antisense: 5'-AATCTCACCAGCTGCTGGTA-3'   |
| hSox7      | Sense: 5'-TGAGCCAGGTGGAACCTCCT-3'<br>Antisense: 5'-CTGGGAGACCGGAACATGC-3'    |
| hSox8      | Sense: 5'-TGTCTCCTTGCTGGCAGAGT-3'<br>Antisense: 5'-GAGCAAACGAGCAACGTGATG-3'  |
| hSox9      | Sense: 5'-AGCGAACGCACATCAAGAC-3'<br>Antisense: 5'-GCTGTAGTGTGGGAGGTTGAA-3'   |
| hSox11     | Sense: 5'-GGTGGATAAGGATTTGGATTTCG-3'<br>Antisense: 5'-GCTCCGGCGTGCAGTAGT-3'  |
| hβ-catenin | Sense: 5'-AAAATGGCAGTGCCTTTAG-3'<br>Antisense: 5'-TTTGAAGGCAGTCTGTCTGTA-3'   |
| hGAPDH     | Sense: 5'-CGGGAAACTGTGGCGTGAT-3'<br>Antisense: 5'-ATGCCAGTGAGCTTCCCGT-3'     |
| WT1        | Sense: 5'-AGCACGGTCACTTTTCGACG-3'<br>Antisense: 5'-GTTTGAAGGAATGGTTGGGGAA-3' |

**Supplemental Table S8: Primer sequences for ChIP-PCR assay**

|        |                                                                              |
|--------|------------------------------------------------------------------------------|
| mDNMT1 | Sense: 5'- TATAGCCAGGAGGTGTGGGTG -3'<br>Antisense: 5'-AAGGAGACCCCGGCTTTTT-3' |
|--------|------------------------------------------------------------------------------|
